# Supplementary material
Source: PubMed Central journal article supplement (PMC3670680)

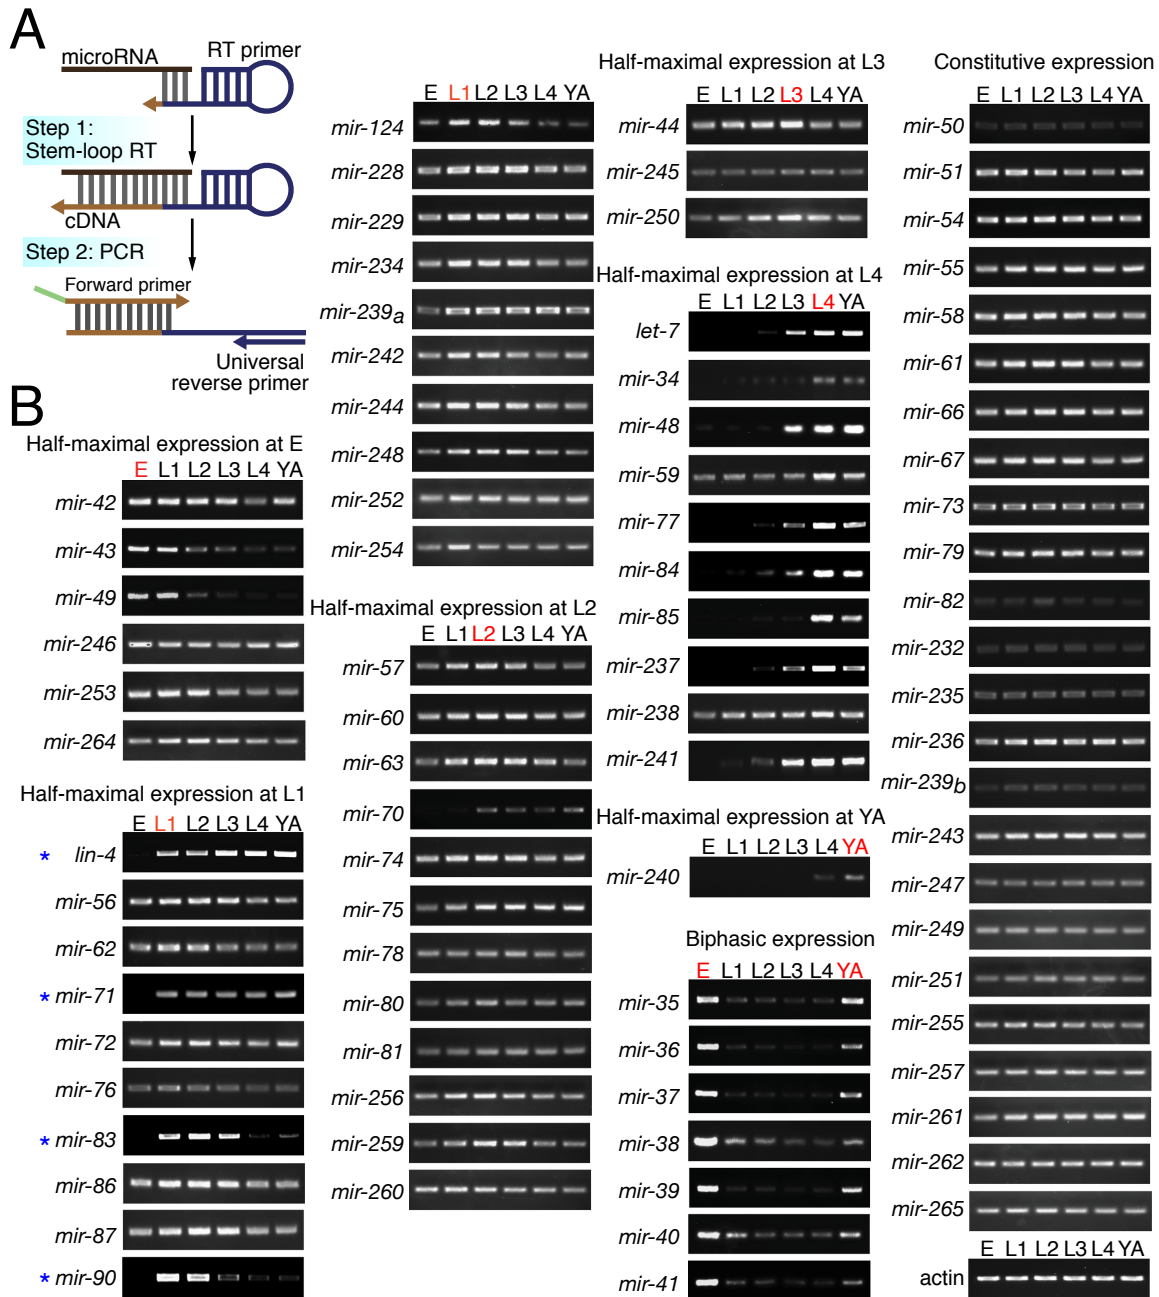

Figure-S1 (Chang)

Supplement: NIHMS473256-supplement-Fig__S1.pdf [file NIHMS473256-supplement-Fig__S1.pdf]

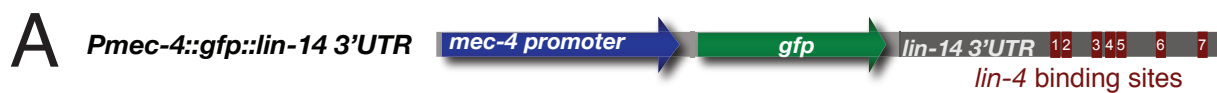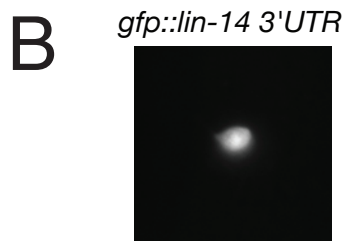

*gfp::lin-14 3'UTR*  
+*lin-4*

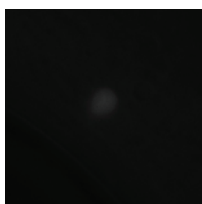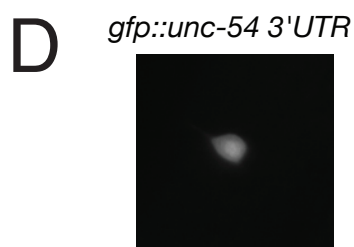

*gfp::unc-54 3'UTR*  
+*lin-4*

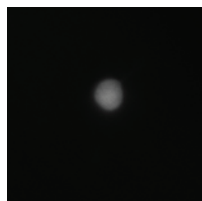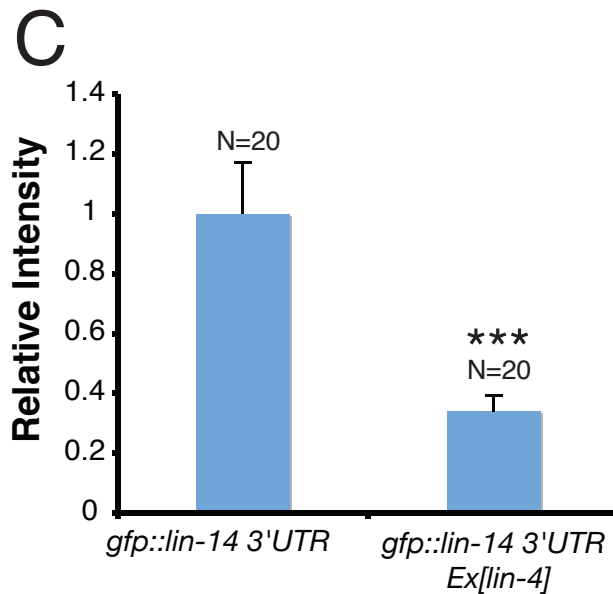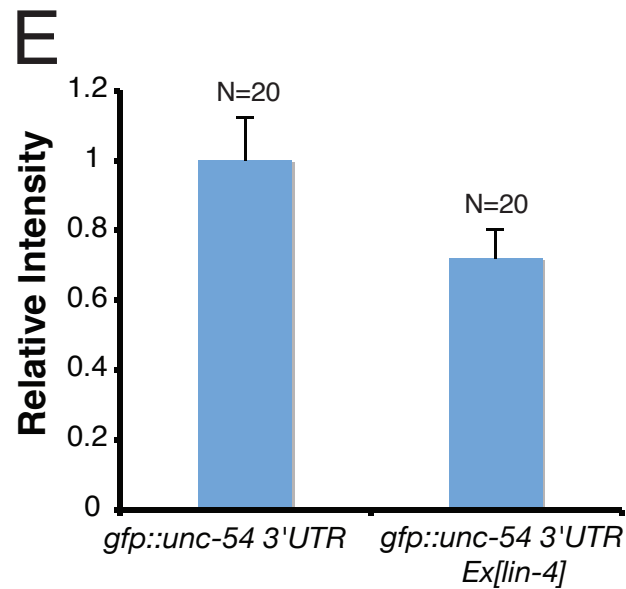

Figure-S2 (Chang)

Supplement: NIHMS473256-supplement-Fig__S2.pdf [file NIHMS473256-supplement-Fig__S2.pdf]

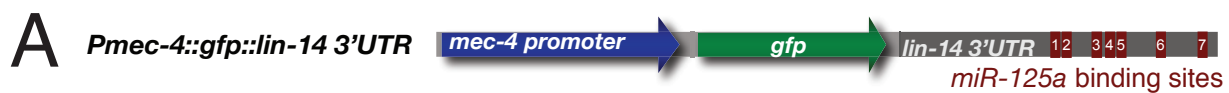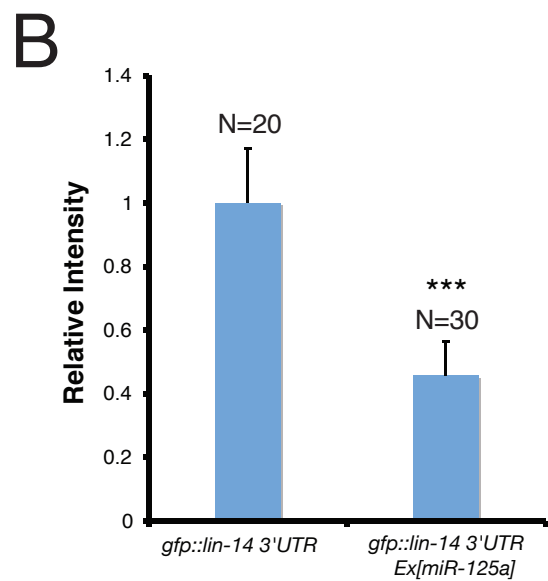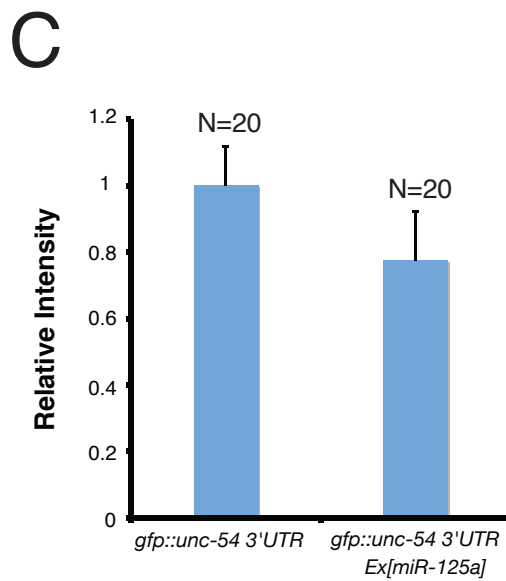

Figure-S3 (Chang)

Supplement: NIHMS473256-supplement-Fig__S3.pdf [file NIHMS473256-supplement-Fig__S3.pdf]

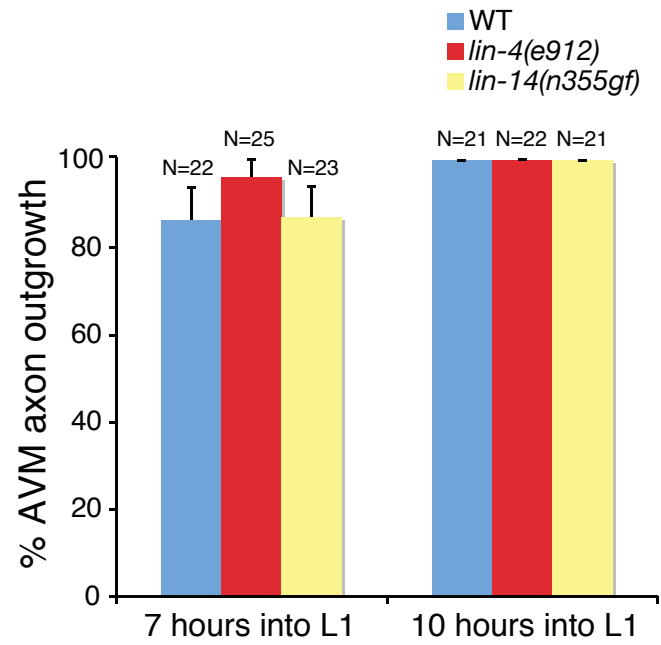

Figure-S4 (Chang)

Supplement: NIHMS473256-supplement-Fig__S4.pdf [file NIHMS473256-supplement-Fig__S4.pdf]

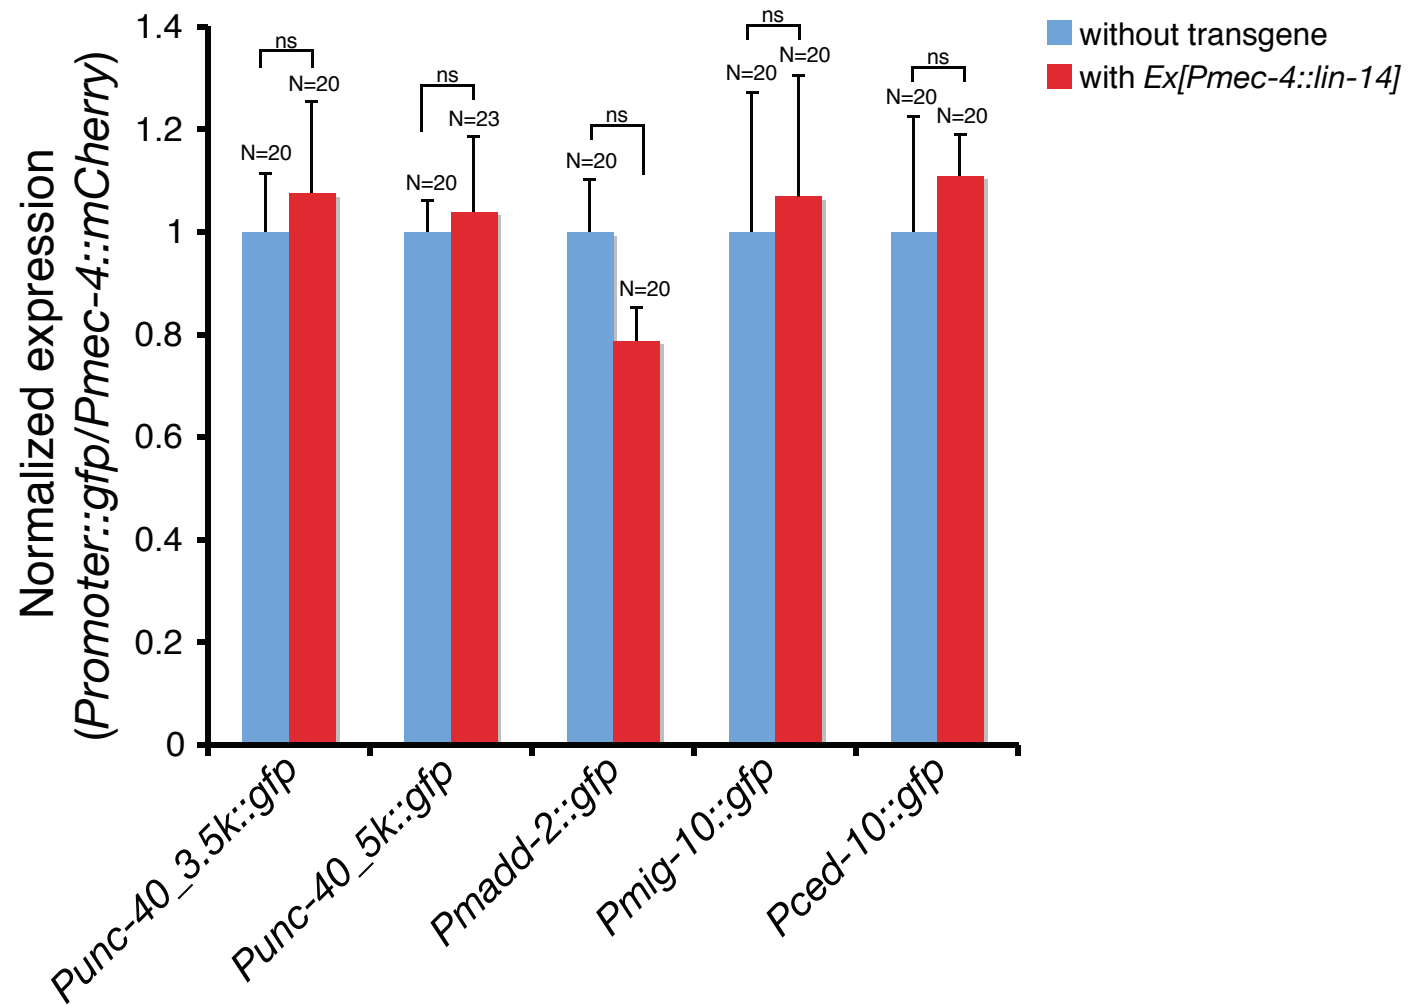

Figure-S5 (Chang)

Supplement: NIHMS473256-supplement-Fig__S5.pdf [file NIHMS473256-supplement-Fig__S5.pdf]
